# Supplementary material for: Confirmation of Pinnatoxins and Spirolides in Shellfish and Passive Samplers from Catalonia (Spain) by Liquid Chromatography Coupled with Triple Quadrupole and High-Resolution Hybrid Tandem Mass Spectrometry
Source: PubMed Central journal article supplement (PMC4071598; doi:10.3390/md12063706), 2014-06-23
Supplement: marinedrugs-12-03706-s001.pdf [file marinedrugs-12-03706-s001.pdf]

## Supplementary Information

**Figure S1. (A–C):** Three methanol blanks screened for spirolides (SPX-1 to SPX-I, see Table 1 in the main article) in the full MS scan at 10 ppm mass error tolerance. Blanks were included in a batch of sixty samples (shellfish and SPATT samples) every six samples. **(A)** First methanol blank; **(B)** Fifth methanol blank; **(C)** Tenth methanol blank. Carryover was discarded by checking the methanol blanks analyzed after the most concentrated level of the calibration curves, which never showed signal for PnTX-G of SPX-1 at their retention times. Peaks did not correlate with the expected relative retention time of the target analytes, but there are no standards available for PnTXs and SPXs other than PnTX-G and SPX-1.

RT: 0.00 - 12.00 SM: 11G

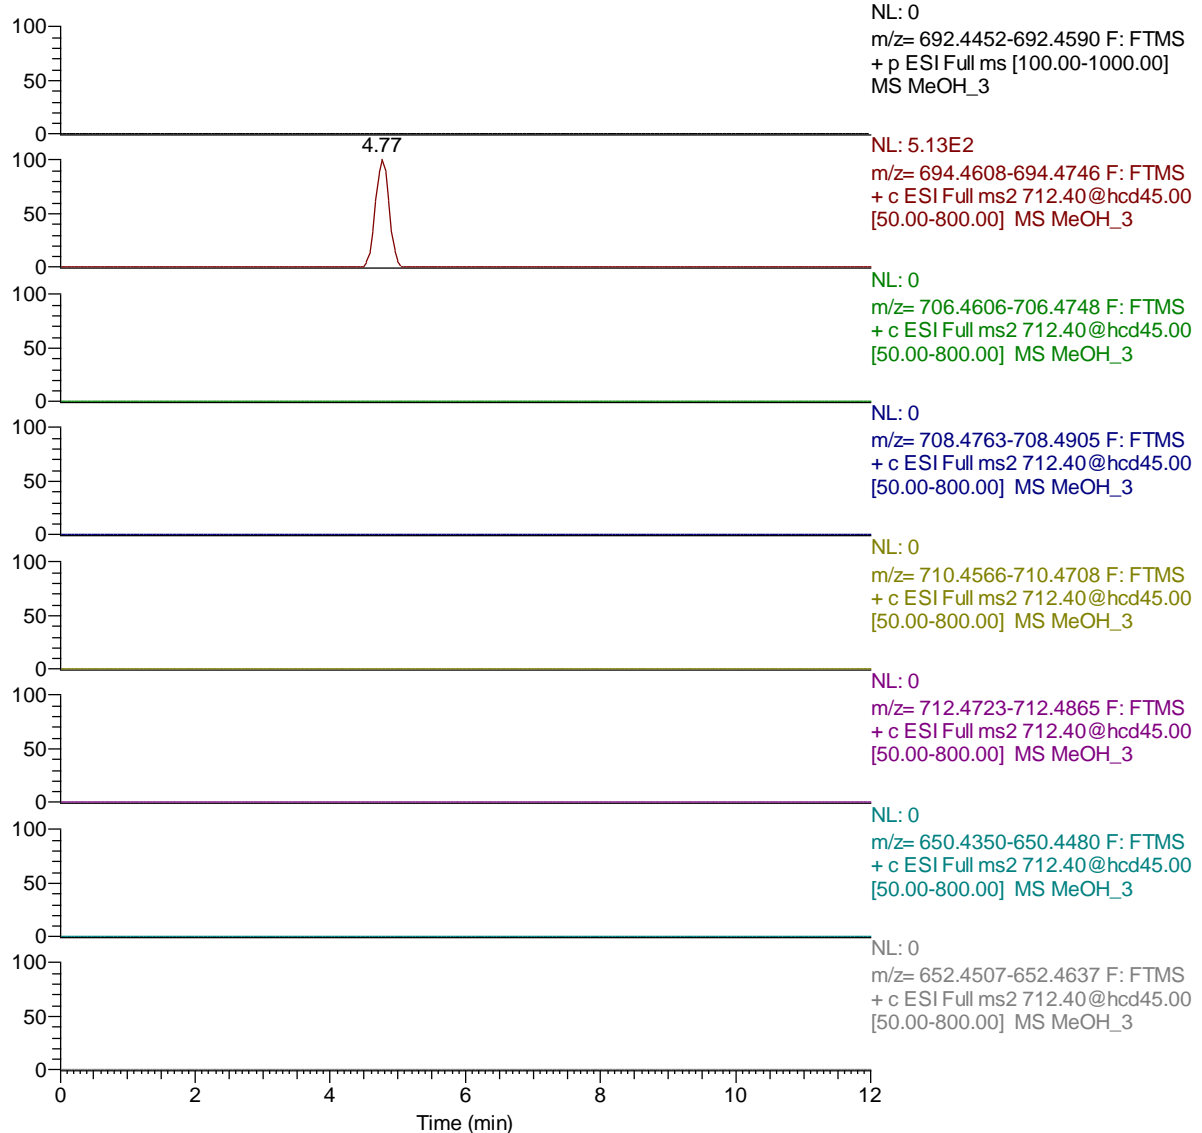

(A)

Figure S1. Cont.

RT: 0.00 - 12.00 SM: 11G

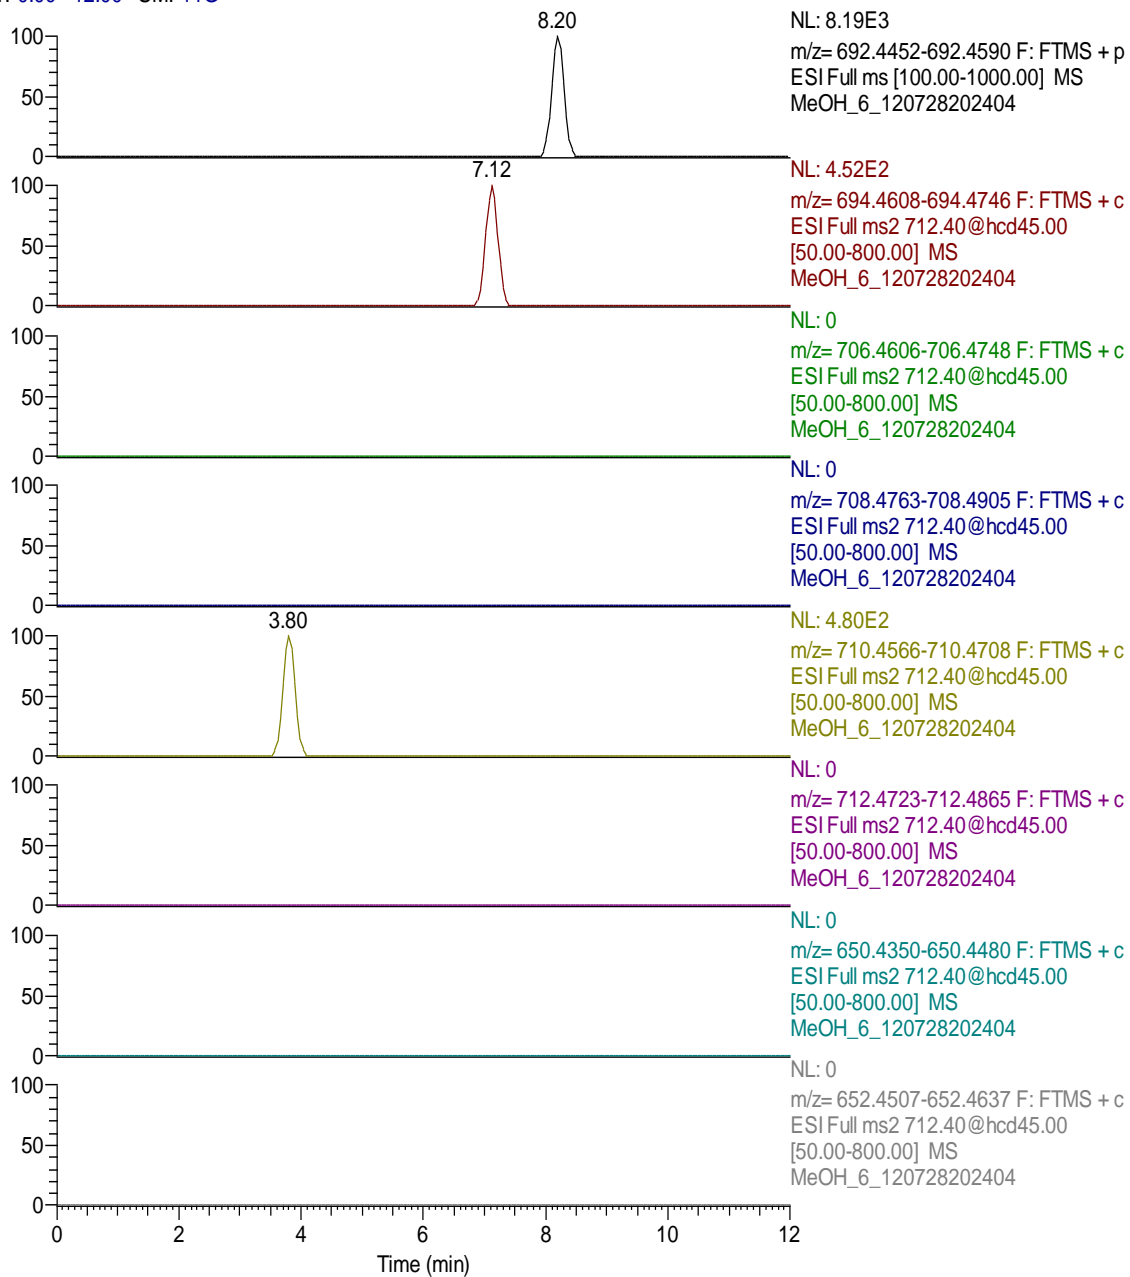

(B)

Figure S1. Cont.

RT: 0.00 - 12.01 SM: 11G

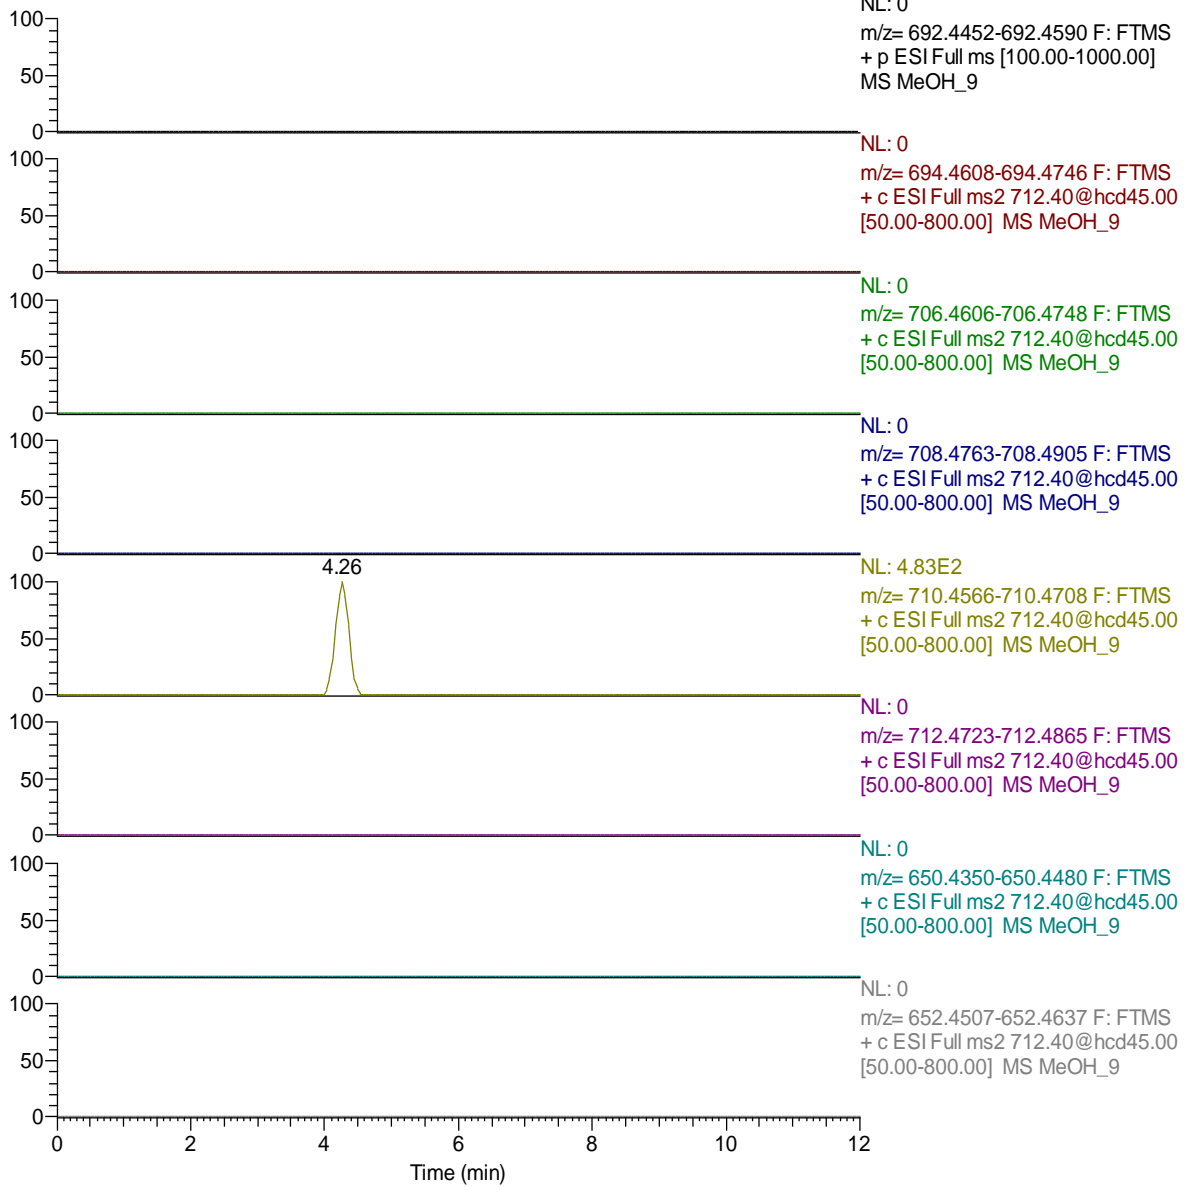

(C)

**Figure S2.** Isotopic pattern simulation for PnTXG (C<sub>42</sub>H<sub>64</sub>NO<sub>7</sub>) calculated by Xcalibur<sup>®</sup> 2.07.

C42H64NO7: C42 H64 N1 O7 pa Chrg 1

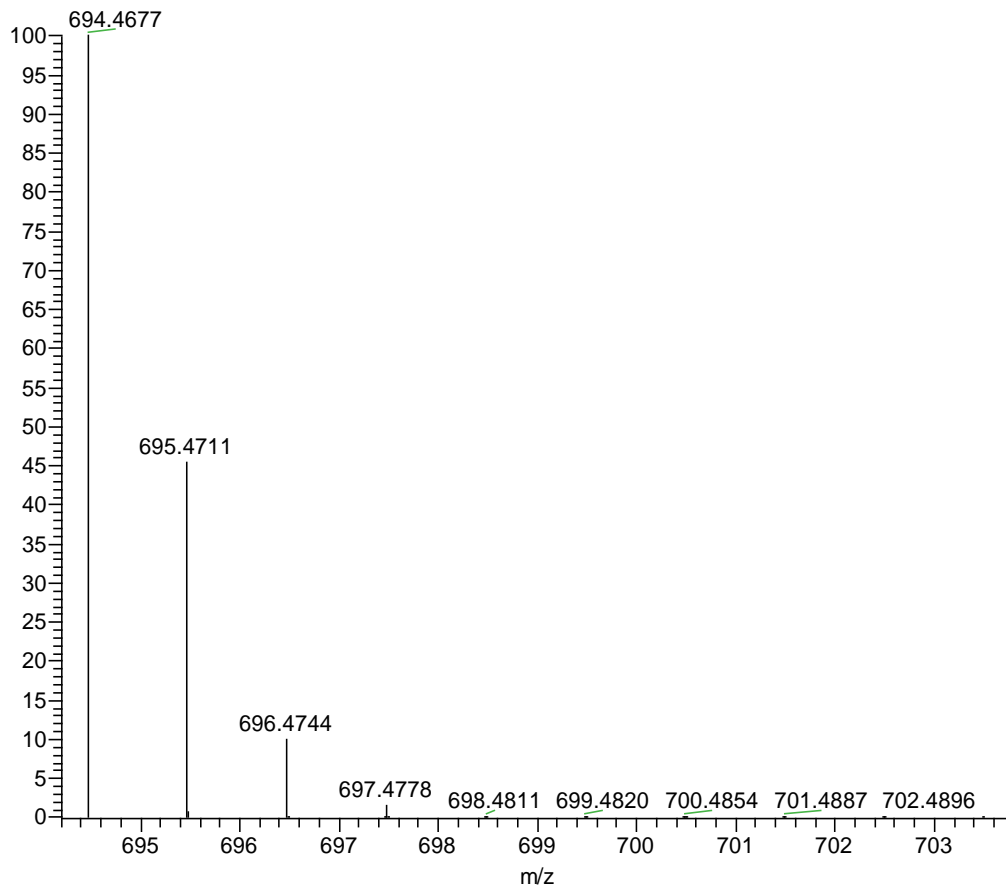

| m/z      | Intensity | Relative |
|----------|-----------|----------|
| 694.4677 | 618847.0  | 100.00   |
| 695.4711 | 281117.8  | 45.43    |
| 696.4744 | 62330.1   | 10.07    |
| 697.4778 | 8988.6    | 1.45     |
| 696.4720 | 8902.1    | 1.44     |
| 695.4740 | 4555.2    | 0.74     |
| 697.4753 | 4043.9    | 0.65     |
| 695.4648 | 2285.8    | 0.37     |
| 696.4774 | 2069.3    | 0.33     |
| 695.4719 | 1650.1    | 0.27     |
| 696.4681 | 1038.3    | 0.17     |
| 698.4811 | 947.9     | 0.15     |
| 698.4787 | 896.6     | 0.14     |
| 696.4753 | 749.6     | 0.12     |
| 697.4807 | 458.8     | 0.07     |
| 697.4715 | 230.2     | 0.04     |
| 697.4787 | 166.2     | 0.03     |
| 699.4820 | 129.3     | 0.02     |
| 699.4845 | 77.9      | 0.01     |
| 698.4841 | 66.2      | 0.01     |

**Figure S3.** Contour Plot of LC-MS precursor scan for  $m/z$ 164.2 (CE 45 V) with a Triple Quadrupole QTRAP 3200<sup>®</sup>. Sample of mussel from Alfacs Bay (May 2012) with 60  $\mu\text{g}/\text{kg}$  free PnTXG. The characteristic pattern with diagonal lines is evident in the figure, which could be consistent with an acylation of PnTXG with fatty acids; although PnTXG esters described in literature [1] were formed by longer chains with  $m/z$  values between  $m/z$  904 (C14:0) and  $m/z$  1034. (C24:5). The low concentration of these compounds constrained their characterization by MS<sup>2</sup>.

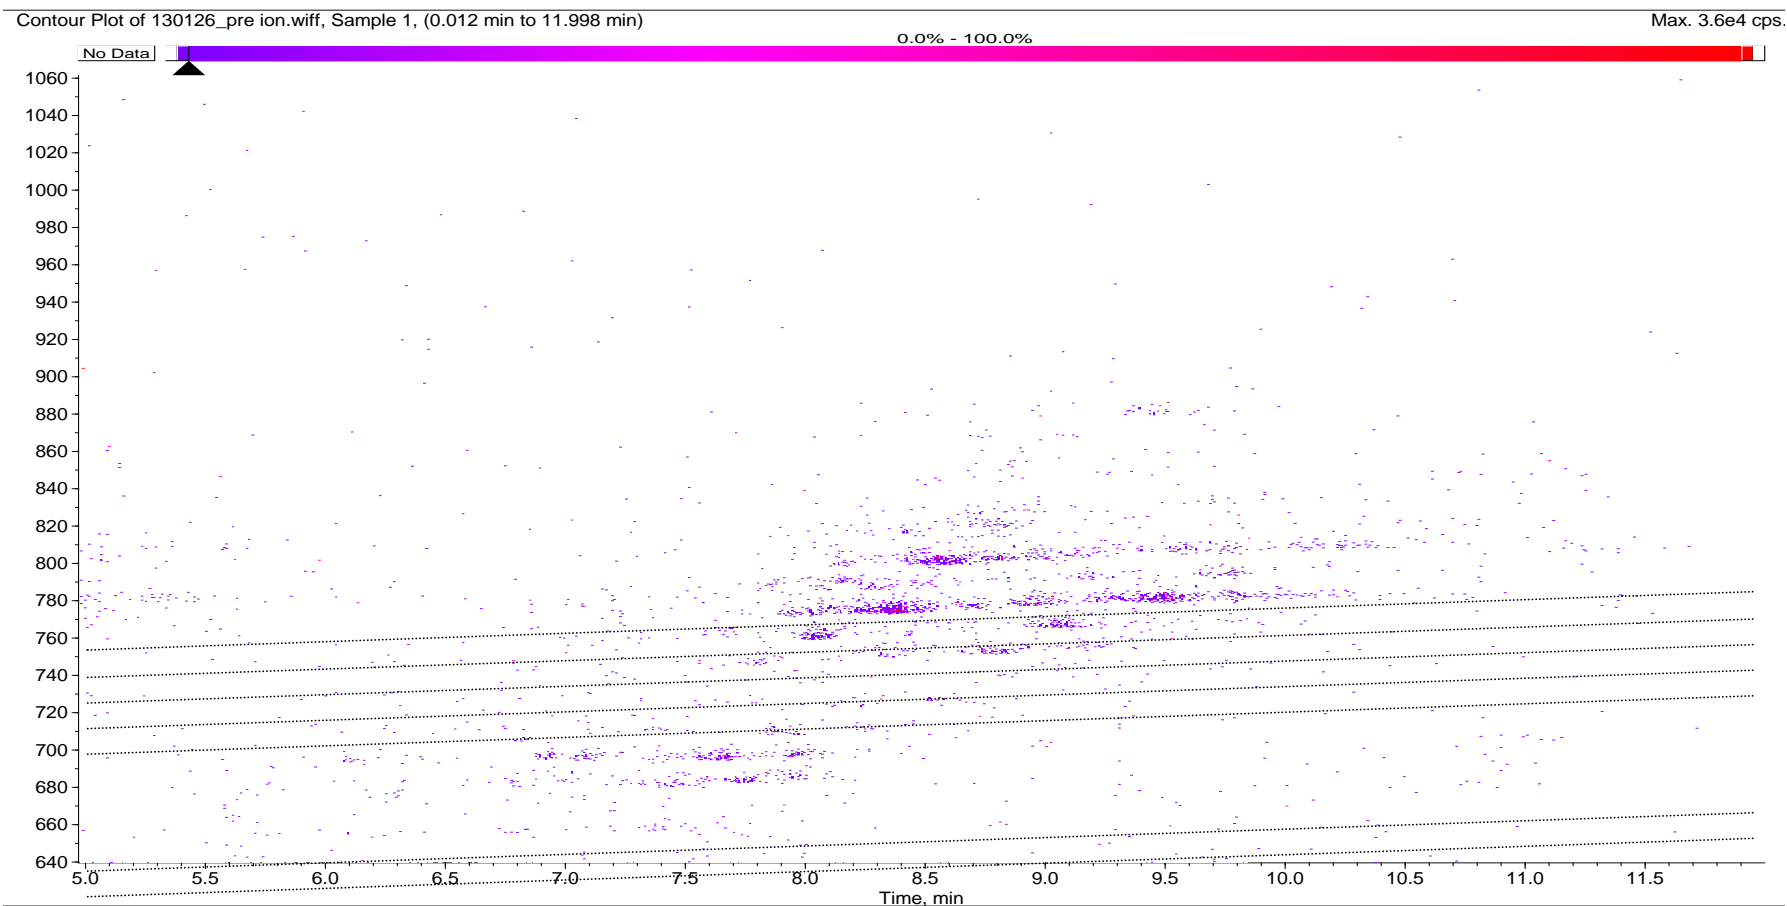

**Table S1.** Assigned mass errors ( $\Delta$  in ppm) to the molecular formula and theoretical  $m/z$ , and ion intensities on the precursor ion (A) and the first three isotopes (A + m) of PnTX-G ( $n = 2$  for 19 and 1.9 ng/mL;  $n = 1$  for 190 and 0.2 ng/mL). Mass errors larger than 5 ppm are in bold, also the intensities associated with the analysis that yielded these high mass errors. When intensity were below 1E4, mass accuracy dropped below 5 ppm.

| Isotopes—PnTX-G ( $m/z$ )           |                   | Concentration—PnTX-G (ng/mL) |                    |                    |                    |
|-------------------------------------|-------------------|------------------------------|--------------------|--------------------|--------------------|
|                                     |                   | 190                          | 19                 | 1.9                | 0.2                |
| $\Delta$ (ppm)                      |                   |                              |                    |                    |                    |
| A (Prec ion)<br>$C_{42}H_{64}NO_7$  | ( $m/z$ 694.4677) | -0.1                         | -0.4               | -0.1               | 0.4                |
| A + 1<br>$C_{42}^{13}CH_{64}NO_7$   | ( $m/z$ 695.4711) | -0.1                         | -0.5               | -1.2               | -20.6              |
| A + 2<br>$C_{42}^{13}C_2H_{64}NO_7$ | ( $m/z$ 696.4744) | 0.1                          | -0.1               | -1.4               | -22.7              |
| A + 3<br>$C_{42}^{13}C_3H_{64}NO_7$ | ( $m/z$ 697.4778) | 0.7                          | 1.1                | -50.5              | 15.2               |
| <b>Intensity Counts</b>             |                   |                              |                    |                    |                    |
| A (Prec ion)<br>$C_{42}H_{64}NO_7$  | ( $m/z$ 694.4677) | $1.56 \times 10^7$           | $1.95 \times 10^6$ | $2.17 \times 10^5$ | $1.74 \times 10^4$ |
| A + 1<br>$C_{42}^{13}CH_{64}NO_7$   | ( $m/z$ 695.4711) | $7.24 \times 10^6$           | $8.88 \times 10^5$ | $1.01 \times 10^5$ | $9.36 \times 10^3$ |
| A + 2<br>$C_{42}^{13}C_2H_{64}NO_7$ | ( $m/z$ 696.4744) | $1.80 \times 10^6$           | $2.18 \times 10^5$ | $1.57 \times 10^4$ | $8.10 \times 10^2$ |
| A + 3<br>$C_{42}^{13}C_3H_{64}NO_7$ | ( $m/z$ 697.4778) | $3.13 \times 10^5$           | $2.81 \times 10^4$ | $6.74 \times 10^3$ | $7.24 \times 10^2$ |

**Table S2.** Differences in (%) in intensity ratios between the isotopes (A + m) and the precursor ion (A) compared to the simulated isotopic pattern for PnTX-G ( $n = 2$  for 19 and 1.9 ng/mL;  $n = 1$  for 190 and 0.2 ng/mL). For low concentrations (1.9 and 0.2 ng/mL PnTX-G) the difference between the simulated isotopic ratios and the measured isotopic ratios is very evident (over 35%).

| Isotopes—PnTXG ( $m/z$ ) | Concentration—PnTX-G (ng/mL) |     |      |      |
|--------------------------|------------------------------|-----|------|------|
|                          | 190                          | 19  | 1.9  | 0.2  |
| A + 1/A (Prec ion)       | -2                           | 0   | -2   | -19  |
| A + 2/A (Prec ion)       | -15                          | -11 | 38   | 54   |
| A + 3/A (Prec ion)       | -39                          | 0   | -175 | -187 |

**Table S3.** Isotopic pattern analysis in sample MUS120523. Assigned mass errors (in ppm) to the molecular formula and theoretical  $m/z$ , and ion intensities on the precursor ion (A) and the first three isotopes (A + m) of PnTX-G. Differences in (%) in intensity ratios between the isotopes (A + m) and the precursor ion (A) compared to the simulated isotopic pattern for PnTX-G. Only A + 1 could be measured with appropriate mass accuracy, and its relative intensity compared to the precursor ion (A) similar to the simulated relative intensity between A + 1 and A (12.5% difference). A + 2 could not be measured accurately and A + 3 was not found.

| Isotopes—PnTXG ( $m/z$ )            |                   | Sample MUS120523 |                    |                  |                     |
|-------------------------------------|-------------------|------------------|--------------------|------------------|---------------------|
|                                     |                   | $m/z$ Found      | Intensity Counts   | Mass Error (ppm) | % Diff. Int. Ratios |
| A (Prec ion)<br>$C_{42}H_{64}NO_7$  | ( $m/z$ 694.4677) | 694.4669         | $1.63 \times 10^5$ | 1.15             |                     |
| A + 1<br>$C_{42}^{13}CH_{64}NO_7$   | ( $m/z$ 695.4711) | 695.4702         | $6.46 \times 10^4$ | 1.29             | 12.5                |
| A + 2<br>$C_{42}^{13}C_2H_{64}NO_7$ | ( $m/z$ 696.4744) | 696.4883         | $2.11 \times 10^4$ | -19.96           | -28.7               |
| A + 3<br>$C_{42}^{13}C_3H_{64}NO_7$ | ( $m/z$ 697.4778) | Not found        | Not found          | Not found        | Not found           |

## Reference

- McCarron, P.; Rourke, W.; Hardstaff, W.; Pooley, B.; Quilliam, M. Identification of pinnatoxins and discovery of their fatty acid ester metabolites in mussels (*Mytilus edulis*) from eastern Canada. *J. Agric. Food Chem.* **2012**, *60*, 1437–1446.

© 2014 by the authors; licensee MDPI, Basel, Switzerland. This article is an open access article distributed under the terms and conditions of the Creative Commons Attribution license (<http://creativecommons.org/licenses/by/3.0/>).
